# Supplementary material for: Assessing Site Specificity of Osteoarthritic Gait Kinematics with Wearable Sensors and Their Association with Patient Reported Outcome Measures (PROMs): Knee versus Hip Osteoarthritis
Source: Sensors (Basel). 2021 Aug 10;21(16):5363. doi: 10.3390/s21165363 (PMC8398113; doi:10.3390/s21165363)
Supplement: Supplementary file 1 [file sensors-21-05363-s001.zip › Figure S5.pdf]

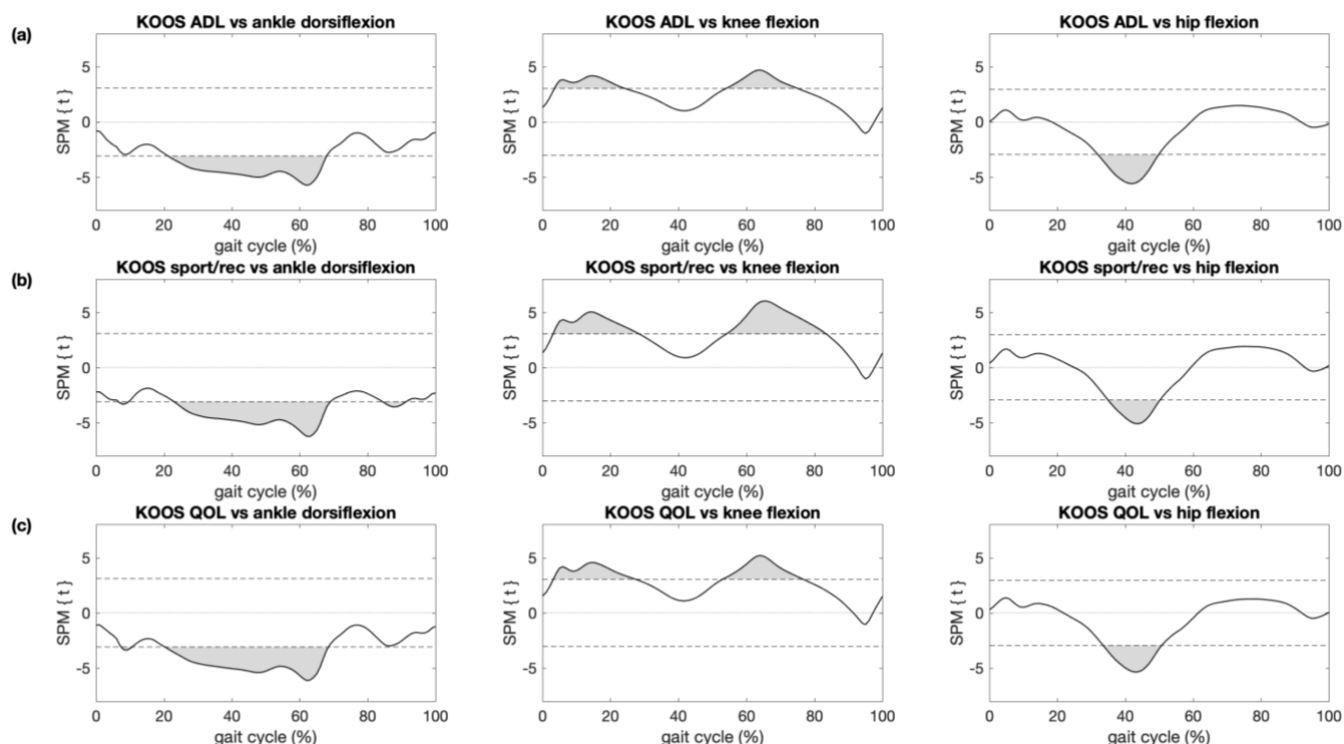

**Figure S5. Association between KOOS subscores and kinematic trajectories.** Results of statistical parametric mapping with regression analysis (SPM{t}) are shown for (a) the KOOS subscore activity of daily living (ADL), (b) the KOOS subscore sport and recreation (sport/rec) and (c) the KOOS subscore quality of life (QOL) and the ankle (left), knee (center) and hip (right) of the affected/left leg where grey areas illustrate regions with statistically significant relationships between KOOS subscores and kinematics ( $P < 0.05$ ).
