# Supplementary material for: Assessing Site Specificity of Osteoarthritic Gait Kinematics with Wearable Sensors and Their Association with Patient Reported Outcome Measures (PROMs): Knee versus Hip Osteoarthritis
Source: Sensors (Basel). 2021 Aug 10;21(16):5363. doi: 10.3390/s21165363 (PMC8398113; doi:10.3390/s21165363)
Supplement: Supplementary file 1 [file sensors-21-05363-s001.zip › Table S1.pdf]

**Table S1. Spatiotemporal and discrete ankle, knee and hip kinematic parameters** in patients with knee osteoarthritis (OA), patients with hip OA and asymptomatic controls. Data are shown as mean (1 standard deviation). 95% confidence intervals (CI) of the difference between groups are shown.

| Parameter                                                 | Patients with<br>knee OA<br>N=29 | Patients with<br>hip OA<br>N=30 | Asymptomatic<br>controls<br>N=54 | Knee OA -<br>controls<br>95% CI | Hip OA -<br>controls<br>95% CI | Hip OA -<br>knee OA<br>95% CI |
|-----------------------------------------------------------|----------------------------------|---------------------------------|----------------------------------|---------------------------------|--------------------------------|-------------------------------|
| <i>Spatiotemporal parameters</i>                          |                                  |                                 |                                  |                                 |                                |                               |
| Walking speed (m/s)                                       | 0.98 (0.21)                      | 1.08 (0.22)                     | 1.25 (0.15)                      | [-0.35; -0.19]                  | [-0.26; -0.10]                 | [-0.21; 0.02]                 |
| Stride time (s)                                           | 1.184 (0.144)                    | 1.150 (0.142)                   | 1.107 (0.137)                    | [0.013; 0.141]                  | [-0.020; 0.105]                | [-0.040; 0.109]               |
| Stride length (m)                                         | 1.14 (0.20)                      | 1.18 (0.17)                     | 1.34 (0.13)                      | [-0.27; -0.12]                  | [-0.22; -0.09]                 | [-0.13; 0.06]                 |
| Cadence (steps/minute)                                    | 102.7 (10.1)                     | 108.6 (11.6)                    | 112.6 (8.5)                      | [-14.0; -5.7]                   | [-8.4; 0.4]                    | [-11.6; -0.2]                 |
| Stance phase affected/left side (% gait cycle)            | 65.0 (3.1)                       | 62.9 (2.7)                      | 62.4 (1.9)                       | [1.50; 3.70]                    | [-0.50; 1.52]                  | [0.59; 3.59]                  |
| Stance phase unaffected/right side (% gait cycle)         | 64.7 (4.7)                       | 65.0 (4.7)                      | 62.5 (1.8)                       | [0.71; 3.59]                    | [1.06; 3.94]                   | [-2.81; 2.11]                 |
| Swing phase affected/left side (% gait cycle)             | 35.0 (3.1)                       | 37.1 (2.67)                     | 37.6 (1.9)                       | [-3.70; -1.50]                  | [-1.52; 0.50]                  | [-3.59; -0.59]                |
| Swing phase unaffected/right side (% gait cycle)          | 35.4 (4.7)                       | 35.0 (4.7)                      | 37.5 (1.8)                       | [-3.59; -0.71]                  | [-3.94; -1.06]                 | [-2.11; 2.81]                 |
| Single support phase affected/left side (% gait cycle)    | 35.6 (4.4)                       | 35.1 (4.4)                      | 37.6 (1.7)                       | [-3.31; -0.61]                  | [-3.76; -1.06]                 | [-1.84; 2.75]                 |
| Single support phase unaffected/right side (% gait cycle) | 35.4 (2.8)                       | 37.9 (4.0)                      | 37.6 (1.9)                       | [-3.25; -1.18]                  | [-1.04; 1.53]                  | [-4.25; -0.67]                |
| Double support phase affected/left side (% gait cycle)    | 15.5 (5.1)                       | 16.4 (11.1)                     | 12.6 (1.7)                       | [1.45; 4.49]                    | [0.70; 6.91]                   | [-5.35; 3.68]                 |
| Double support phase unaffected/right side (% gait cycle) | 17.4 (11.9)                      | 13.5 (4.8)                      | 12.8 (2.3)                       | [1.25; 8.02]                    | [-0.79; 2.35]                  | [-0.85; 8.57]                 |
| Double support time affected/left side (s)                | 0.184 (0.070)                    | 0.190 (0.134)                   | 0.153 (0.098)                    | [-0.009; 0.073]                 | [-0.014; 0.088]                | [-0.062; 0.050]               |
| Double support time unaffected/right side (s)             | 0.202 (0.126)                    | 0.157 (0.067)                   | 0.144 (0.037)                    | [0.020; 0.094]                  | [-0.010; 0.036]                | [-0.008; 0.097]               |

| Parameter                                                                      | Patients with<br>knee OA<br>N=29 | Patients with<br>hip OA<br>N=30 | Asymptomatic controls<br>N=54 | Knee OA -<br>controls<br>95% CI | Hip OA -<br>controls<br>95% CI | Hip OA -<br>knee OA<br>95% CI |
|--------------------------------------------------------------------------------|----------------------------------|---------------------------------|-------------------------------|---------------------------------|--------------------------------|-------------------------------|
| <i>Ankle kinematics</i>                                                        |                                  |                                 |                               |                                 |                                |                               |
| Dorsiflexion at initial contact affected /left side (°)                        | 3.2 (5.3)                        | 2.8 (4.3)                       | 1.6 (5.1)                     | [-0.9; 4.0]                     | [-1.0; 3.4]                    | [-2.2; 3.0]                   |
| Dorsiflexion at initial contact unaffected / right side (°)                    | 2.2 (3.8)                        | 2.3 (3.9)                       | 2.1 (4.5)                     | [-1.8; 2.1]                     | [-1.7; 2.2]                    | [-2.1; 1.9]                   |
| Maximum plantarflexion during weight acceptance affected /left side (°)        | 8.0 (2.3)                        | 8.0 (2.6)                       | 9.0 (3.2)                     | [-0.4; 2.4]                     | [-0.4; 2.3]                    | [-1.2; 1.4]                   |
| Maximum plantarflexion during weight acceptance unaffected / right side (°)    | 7.9 (2.3)                        | 8.3 (2.4)                       | 8.9 (2.8)                     | [-0.3; 2.1]                     | [-0.6; 1.8]                    | [-0.9; 1.6]                   |
| Maximum dorsiflexion during terminal stance affected /left side (°)            | 15.8 (3.9)                       | 14.1 (4.8)                      | 10.8 (3.4)                    | [3.3; 6.7]                      | [1.5; 5.1]                     | [-0.6; 4.1]                   |
| Maximum dorsiflexion during terminal stance unaffected / right side (°)        | 14.4 (4.0)                       | 12.7 (4.0)                      | 9.9 (3.4)                     | [2.8; 6.3]                      | [1.0; 4.4]                     | [-0.3; 3.9]                   |
| Maximum plantarflexion during pre-swing affected /left side (°)                | 13.1 (7.8)                       | 15.5 (8.8)                      | 19.5 (5.3)                    | [3.4; 9.3]                      | [0.9; 7.0]                     | [-2.1; 6.9]                   |
| Maximum plantarflexion during pre-swing unaffected / right side (°)            | 14.8 (8.0)                       | 16.7 (6.7)                      | 20.2 (4.9)                    | [2.5; 8.3]                      | [0.9; 6.1]                     | [-2.0; 5.8]                   |
| Range of motion during stance affected /left side (°)                          | 23.8 (3.5)                       | 22.1 (5.7)                      | 19.7 (4.6)                    | [2.0; 6.1]                      | [0.1; 4.7]                     | [-0.9; 4.2]                   |
| Range of motion during stance unaffected / right side (°)                      | 22.4 (4.7)                       | 20.9 (4.3)                      | 18.8 (4.6)                    | [1.4; 5.8]                      | [0.1; 4.2]                     | [-0.9; 3.9]                   |
| Range of motion during terminal stance / pre-swing affected /left side (°)     | 28.9 (7.7)                       | 29.6 (8.4)                      | 30.3 (5.6)                    | [-4.4; 1.7]                     | [-3.7; 2.4]                    | [-5.0; 3.7]                   |
| Range of motion during terminal stance / pre-swing unaffected / right side (°) | 29.2 (7.3)                       | 29.4 (7.3)                      | 30.1 (5.3)                    | [-3.8; 2.0]                     | [-3.6; 2.0]                    | [-4.0; 3.8]                   |

| Parameter                                                                      | Patients with<br>knee OA<br>N=29 | Patients with<br>hip OA<br>N=30 | Asymptomatic controls<br>N=54 | Knee OA -<br>controls<br>95% CI | Hip OA -<br>controls<br>95% CI | Hip OA -<br>knee OA<br>95% CI |
|--------------------------------------------------------------------------------|----------------------------------|---------------------------------|-------------------------------|---------------------------------|--------------------------------|-------------------------------|
| <i>Knee kinematics</i>                                                         |                                  |                                 |                               |                                 |                                |                               |
| Flexion at initial contact affected / left side (°)                            | 3.4 (3.8)                        | 5.0 (3.2)                       | 5.2 (3.7)                     | [-3.6; 0.1]                     | [-1.9; 1.4]                    | [-3.5; 0.4]                   |
| Flexion at initial contact unaffected / right side (°)                         | 4.8 (4.5)                        | 6.2 (2.8)                       | 5.7 (2.3)                     | [-2.4; 0.7]                     | [-0.6; 1.7]                    | [-3.4; 0.5]                   |
| Maximum flexion during weight acceptance affected / left side (°)              | 15.3 (5.9)                       | 20.4 (7.0)                      | 21.4 (5.1)                    | [-8.8; -3.4]                    | [-3.8; 1.8]                    | [-8.7; -1.6]                  |
| Maximum flexion during weight acceptance unaffected / right side (°)           | 19.0 (6.2)                       | 22.3 (6.6)                      | 22.0 (4.7)                    | [-5.6; -0.5]                    | [-2.3; 2.9]                    | [-6.7; 0.1]                   |
| Minimum knee flexion during pre-swing affected / left side (°)                 | 8.4 (4.5)                        | 15.3 (5.9)                      | 9.3 (4.8)                     | [-3.3; 1.4]                     | [3.5; 8.5]                     | [-9.9; -4.0]                  |
| Minimum knee flexion during pre-swing unaffected / right side (°)              | 9.2 (5.5)                        | 11.3 (5.1)                      | 9.3 (4.0)                     | [-2.2; 2.1]                     | [-0.1; 4.1]                    | [-4.9; 0.7]                   |
| Maximum flexion during swing affected / left side (°)                          | 58.0 (12.3)                      | 64.7 (11.0)                     | 68.1 (5.9)                    | [-14.5; -5.9]                   | [-7.3; 0.5]                    | [-13.1; -0.3]                 |
| Maximum flexion during swing unaffected / right side (°)                       | 63.2 (9.0)                       | 66.6 (8.8)                      | 68.7 (5.3)                    | [-8.8; -2.3]                    | [-5.3; 1.1]                    | [-8.2; 1.3]                   |
| Range of motion during weight acceptance affected / left side (°)              | 7.0 (4.5)                        | 5.1 (4.0)                       | 12.1 (4.8)                    | [-7.5; -2.8]                    | [-9.1; -4.9]                   | [-0.5; 4.2]                   |
| Range of motion during weight acceptance unaffected / right side (°)           | 9.7 (5.5)                        | 10.9 (5.8)                      | 12.7 (4.0)                    | [-5.2; -0.8]                    | [-4.0; 0.5]                    | [-4.2; 1.8]                   |
| Range of motion during terminal stance / pre-swing affected / left side (°)    | 49.6 (10.7)                      | 49.4 (8.5)                      | 58.8 (5.3)                    | [-13.0; -5.5]                   | [-12.6; -6.3]                  | [-5.0; 5.5]                   |
| Range of motion during terminal stance / pre-swing unaffected / right side (°) | 53.9 (7.0)                       | 55.3 (6.1)                      | 59.4 (4.6)                    | [-8.2; -2.8]                    | [-6.6; -1.7]                   | [-4.8; 2.1]                   |

| Parameter                                                            | Patients with<br>knee OA<br>N=29 | Patients with<br>hip OA<br>N=30 | Asymptomat<br>ic controls<br>N=54 | Knee OA -<br>controls<br>95% CI | Hip OA -<br>controls<br>95% CI | Hip OA -<br>knee OA<br>95% CI |
|----------------------------------------------------------------------|----------------------------------|---------------------------------|-----------------------------------|---------------------------------|--------------------------------|-------------------------------|
| <i>Hip kinematics</i>                                                |                                  |                                 |                                   |                                 |                                |                               |
| Flexion at initial contact affected / left side (°)                  | 29.0 (4.5)                       | 22.7 (5.8)                      | 29.9 (7.2)                        | [-3.8; 2.2]                     | [-10.3; -4.1]                  | [3.6; 9.2]                    |
| Flexion at initial contact unaffected / right side (°)               | 28.8 (5.3)                       | 29.6 (9.0)                      | 30.4 (5.4)                        | [-4.1; 0.9]                     | [-4.0; 2.4]                    | [-4.8; 3.1]                   |
| Maximum flexion during weight acceptance affected / left side (°)    | 29.6 (4.7)                       | 23.8 (5.9)                      | 31.1 (6.7)                        | [-4.4; 1.4]                     | [-10.3; -4.4]                  | [3.0; 8.7]                    |
| Maximum flexion during weight acceptance unaffected / right side (°) | 29.7 (5.4)                       | 30.8 (8.9)                      | 31.4 (5.3)                        | [-4.2; 0.7]                     | [-3.8; 2.5]                    | [-5.1; 2.8]                   |
| Maximum extension during pre-swing affected / left side (°)          | 6.1 (3.0)                        | 5.0 (3.3)                       | 8.3 (3.5)                         | [0.6; 3.8]                      | [1.7; 4.8]                     | [-2.8; 0.6]                   |
| Maximum extension during pre-swing unaffected / right side (°)       | 5.4 (2.6)                        | 5.9 (3.2)                       | 8.4 (3.1)                         | [1.6; 4.3]                      | [1.1; 4.0]                     | [-1.1; 2.0]                   |
| Maximum flexion during swing affected / left side (°)                | 31.1 (4.7)                       | 25.9 (6.1)                      | 33.0 (8.1)                        | [-5.3; 1.5]                     | [-10.4; -3.6]                  | [2.2; 8.1]                    |
| Maximum flexion during swing unaffected / right side (°)             | 31.8 (4.9)                       | 33.1 (9.8)                      | 32.9 (4.8)                        | [-3.4; 1.2]                     | [-3.1; 3.4]                    | [-5.4; 2.9]                   |
| Range of motion during stance affected / left side (°)               | 35.7 (5.5)                       | 28.8 (6.7)                      | 39.5 (8.0)                        | [-7.1; -0.3]                    | [-14.1; -7.1]                  | [3.6; 10.2]                   |
| Range of motion during stance unaffected / right side (°)            | 35.1 (6.4)                       | 36.7 (10.2)                     | 39.8 (5.1)                        | [-7.3; -2.1]                    | [-6.5; 0.2]                    | [-6.1; 3.0]                   |
| Range of motion during pre-swing / swing affected / left side (°)    | 37.2 (5.4)                       | 31.0 (6.1)                      | 41.3 (9.7)                        | [-8.1; -0.1]                    | [-14.2; -6.4]                  | [3.1; 9.3]                    |
| Range of motion during pre-swing / swing unaffected / right side (°) | 37.3 (5.8)                       | 39.0 (10.4)                     | 41.3 (5.0)                        | [-6.5; -1.6]                    | [-5.8; 1.0]                    | [-6.2; 2.8]                   |
